# Supplementary material for: Anthocyanin Hybrid Nanopigments from Pomegranate Waste: Colour, Thermomechanical Stability and Environmental Impact of Polyester-Based Bionanocomposites
Source: MDPI journal article supplement (doi:10.3390/polym13121966), 2021-06-14
Supplement: s1 [file s1]

Barbara Micó-Vicent<sup>1,2</sup>, Marina Ramos<sup>3</sup>, Valentin Viqueira<sup>1</sup>, Francesca Luzi<sup>4</sup>, Franco Dominici<sup>4</sup>, Andrea Terenzi<sup>4</sup>, Etienne Maron<sup>5</sup>, Mahmoud Hamzaoui<sup>5</sup>, Stephane Kohnen<sup>5</sup>, Luigi Torre<sup>4</sup>, Alfonso Jiménez<sup>3</sup>, Debora Puglia<sup>4,\*</sup>, and María Carmen Garrigós<sup>3,\*</sup>

<sup>2</sup> Department of Appl. Stat. & Operat. Research, & Qual., Universitat Politècnica de València, ES-03801, Valencia, Spain; barbara.mico@gmail.com (B.M.)

<sup>4</sup> Department of Civil and Environmental Engineering, University of Perugia, 05100, Terni, Italy; francesca.luzi@unipg.it (F.L.); francodominici1@gmail.com (F.D.); andrea.terenzi@unipg.it (A.T.); luigi.torre@unipg.it (L.T.)

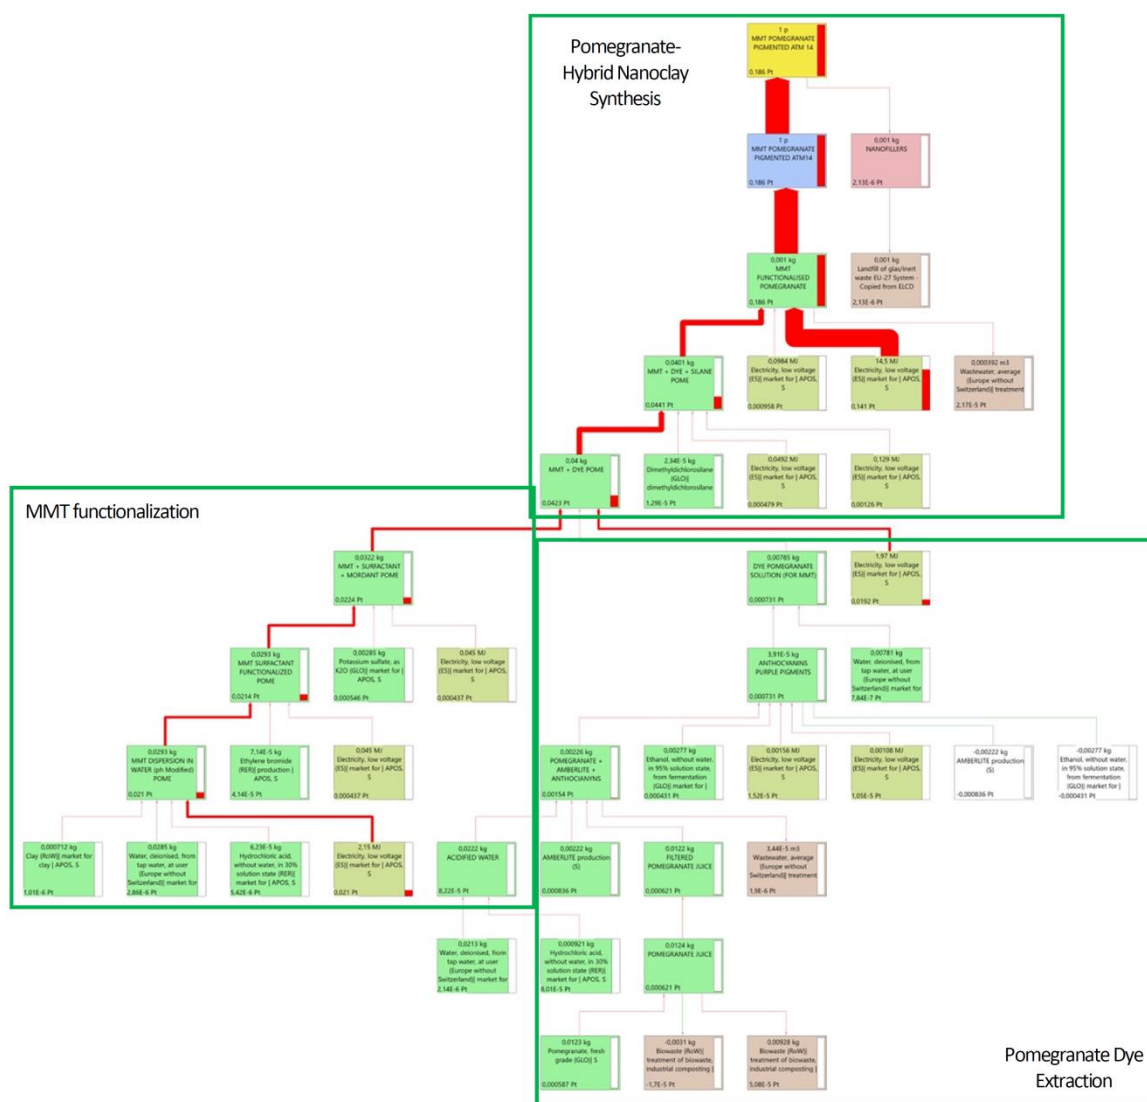

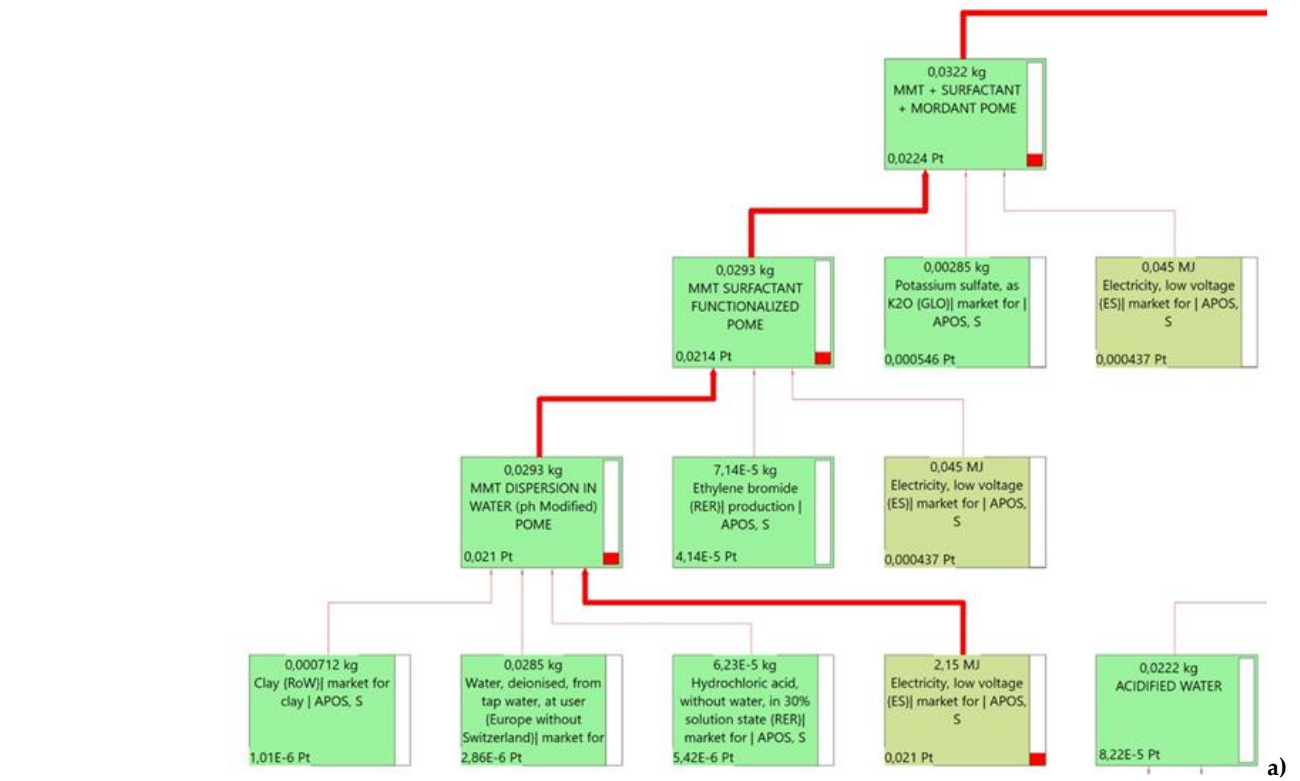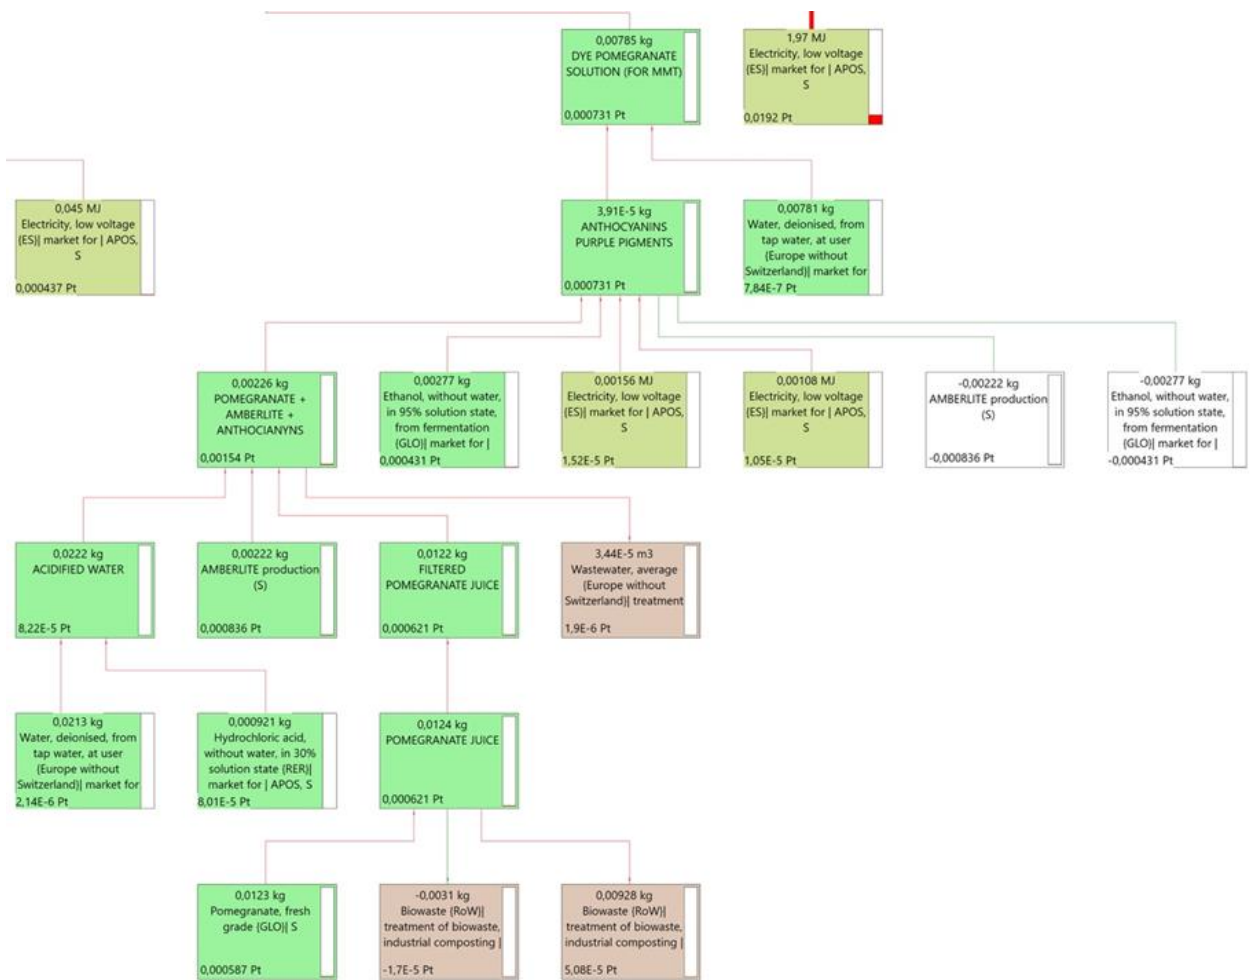

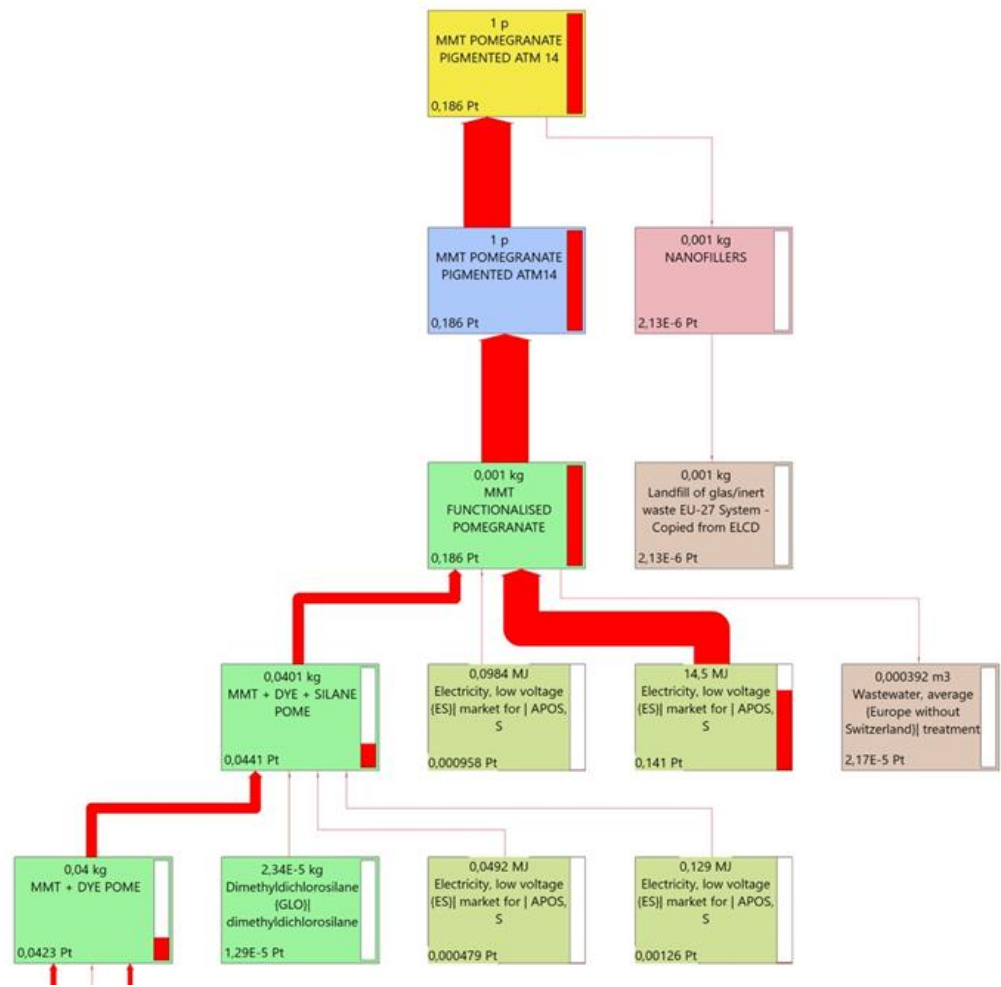

c)

**Figure S1.** MMT-based PDNPs process tree and details of the three sections: pomegranate dye extraction (a), MMT functionalization with surfactant and mordant (b) and nanohybrid preparation (c).
